# Supplementary material for: Systemic Platelet-Activating Factor-Receptor Agonism Enhances Non-Melanoma Skin Cancer Growth
Source: MDPI journal article supplement (doi:10.3390/ijms19103109), 2018-10-11
Supplement: s1 [file s1]

## Supplementary Figure 1

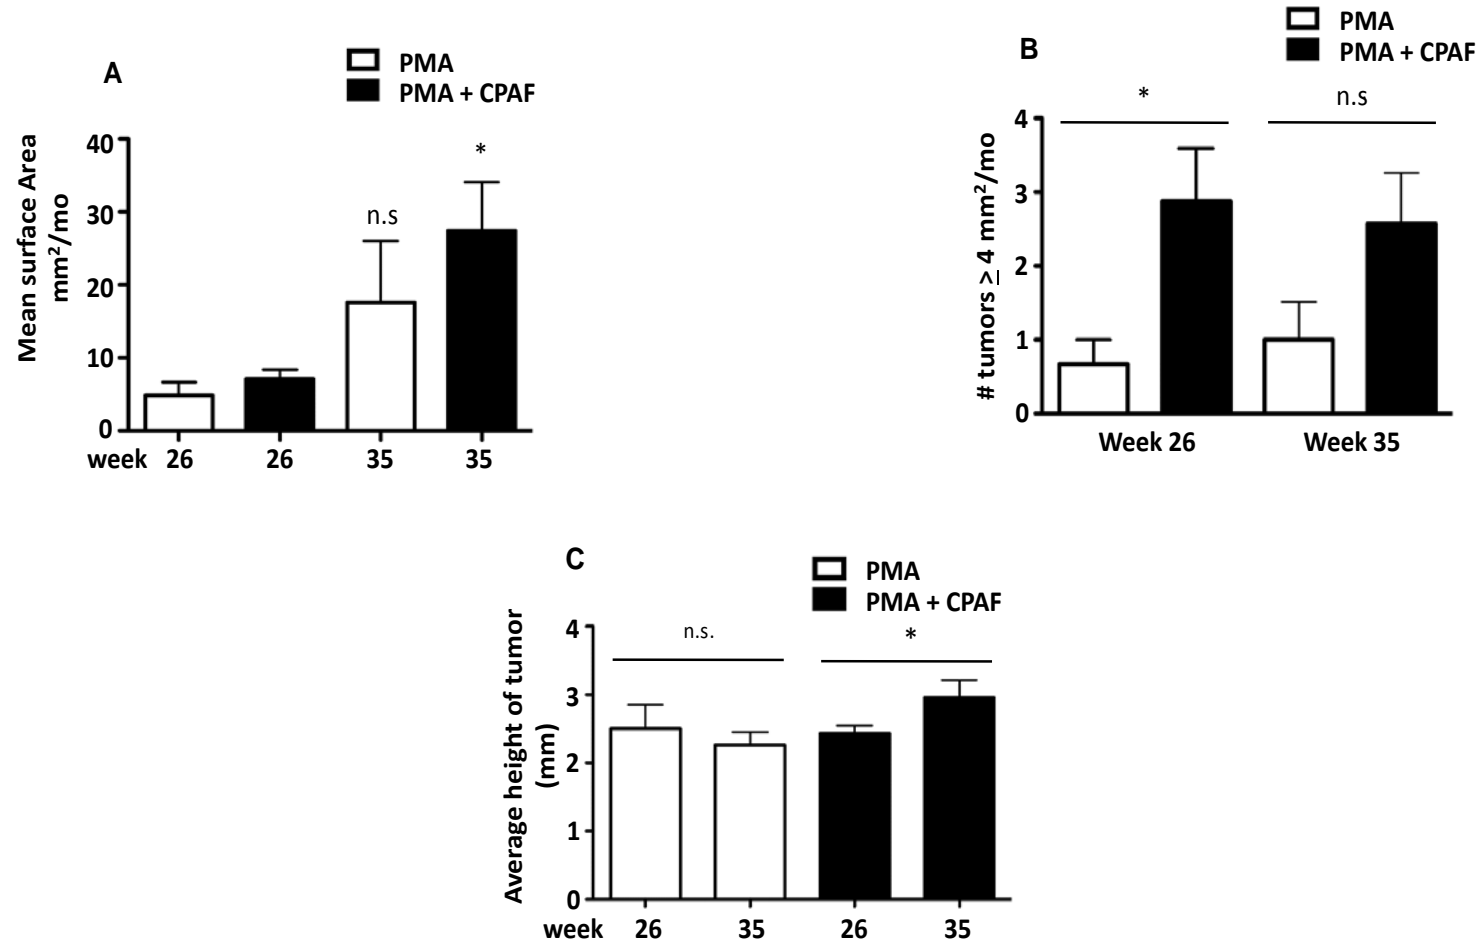

**Supplemental Figure 1. Systemic CPAF increases the growth of tumors.** A) The mean surface area (mm<sup>2</sup>/mouse) in PMA (white) and PMA+CPAF (black) at 26 and 35 weeks are shown. \*denotes statistical significance relative to 26 week PMA+CPAF by two-tailed student t-test ( $p < 0.05$ ). B-C) The average height of tumor (mm) or tumors of  $\geq 2$  mm height/mouse in PMA (white) and PMA+CPAF (black) groups at 26 and 35 weeks are shown. \*denotes statistical significance by two-tailed student t-test ( $p < 0.05$ ).

Supplementary Figure 2

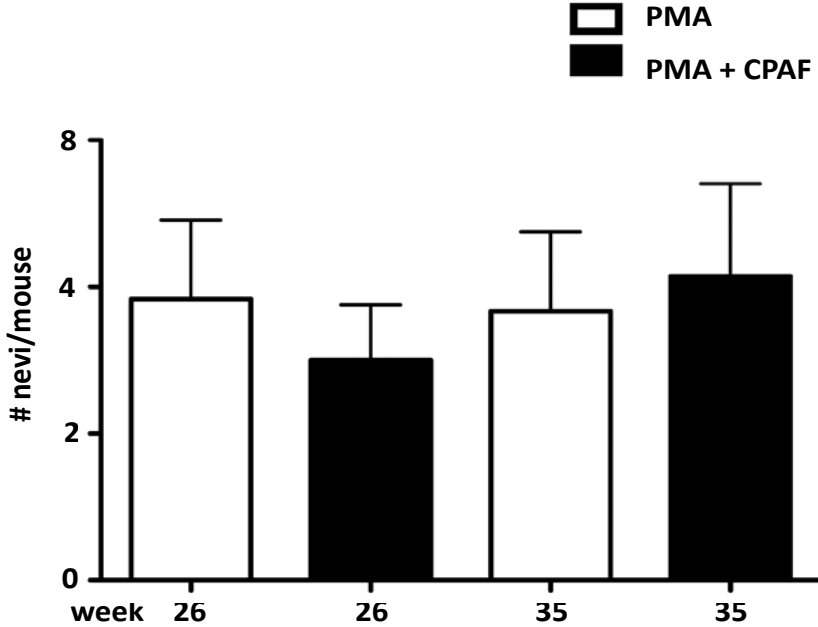

**Supplemental Figure 2. Systemic CPAF does not modulate the number of melanocytic nevi.** The number of melanocytic nevi was counted at every week. The data represent as number of nevi/mouse at week 26 and 35.
